## **SARS-CoV-2 Omicron variant is more stable than the ancestral strain on various surfaces**

Authors:

Alex Wing Hong CHIN<sup>1,3\*</sup>, Alison Man Yuk LAI<sup>1</sup>, Malik PEIRIS<sup>1,2,3</sup>, Leo Lit Man POON<sup>1,2,3\*</sup>

Affiliations:

1. School of Public Health, The University of Hong Kong, Hong Kong, China
2. HKU-Pasteur Research Pole, The University of Hong Kong, Hong Kong, China
3. Centre for Immunology & Infection, Hong Kong, China

Corresponding authors:

Alex Wing Hong Chin

Address: School of Public Health, The University of Hong Kong

Phone: +852-39179943

Email: [alexchin@hku.hk](mailto:alexchin@hku.hk)

Leo Lit Man POON

Address: School of Public Health, The University of Hong Kong

Phone: +852-39179943

Email: [llmpoon@hku.hk](mailto:llmpoon@hku.hk)

Word count:

Abstract: 46 words

Text: 797 words

Running title: Extra stability of SARS-CoV-2 Omicron variant

Keywords:

SARS-CoV-2, Omicron, variant of concern, stability

1    **Abstract:**

2    The Omicron BA.1 SARS-CoV-2 variant of concern spreads quickly around the world and  
3    outcompetes other circulating strains. We examined the stability of this SARS-CoV-2  
4    variant on various surfaces and revealed that the Omicron variant is more stable than its  
5    ancestral strain on smooth and porous surfaces.

6

7

## 8    **Text:**

9    The newly emerged Omicron SARS-CoV-2 variant of concern (VOC) is highly transmissible  
10   in humans. It outcompetes other previously known variants and dominates in different  
11   geographical locations in recent months (1). Its spike protein has more than 30 mutations  
12   compared to the ancestral strain (2). A recent structural study indicates its spike protein is  
13   more stable than the ancestral strain (3). This prompts us to hypothesize that Omicron  
14   VOC is also more stable on different surfaces. We previously showed that the ancestral  
15   SARS-CoV-2 can still be infectious for several days and hours at room temperature on  
16   smooth and porous surfaces, respectively (4). Here, we report that Omicron VOC is more  
17   stable than the ancestral strain on these surfaces.

18

19   Previously described ancestral SARS-CoV-2 (PANGO lineage A) and Omicron VOC (PANGO  
20   lineage BA.1) were used in this study (5, 6). Their stability on different surfaces were  
21   tested using our previously described protocol by us (4, 7). In brief, a 5 µl droplet of each  
22   virus ( $10^7$  TCID<sub>50</sub>/ml) was applied on different surfaces with a dimension of 1x1 cm<sup>2</sup>. The  
23   treated surfaces were incubated at room temperature (21-22°C) for different time points  
24   as indicated and were then immersed in viral transport medium for 30 min to recover  
25   residual infectious virus. The recovered virus was titrated by TCID<sub>50</sub> assays using Vero-E6 as  
26   described (4, 7).

27

28 When compared to the ancestral SARS-CoV-2, the Omicron BA.1 variant was shown to be  
 29 more stable on all studied surfaces (Table). At 2 days post-incubation, the infectious viral  
 30 titres of ancestral SARS-CoV-2 recovered from stainless steel, polypropylene sheet and  
 31 glass reduced by 99.91%, >99.86% and 99.9%, respectively. No infectious ancestral SARS-  
 32 CoV-2, except in one out of three treated glass samples, could be recovered on day 4 post-  
 33 incubation. In contrast, the Omicron variant could still be recovered from these treated  
 34 surfaces on day 7 post-incubation. Infectious Omicron variant virus recovered from treated  
 35 stainless steel, polypropylene sheet and glass on day 7 post-incubation reduced by  
 36 98.19%, 99.65% and 98.83%, respectively. Thus, the infectious titres of the Omicron  
 37 variant were not reduced by 3 log<sub>10</sub> units on any of these smooth surfaces at our last study  
 38 time point.

39

40 The stability of the Omicron variant was also higher than ancestral SARS-CoV-2 on porous  
 41 surfaces such as facial tissue paper and printing paper. On tissue paper, viable ancestral  
 42 SARS-CoV-2 was no longer recoverable in 30 min after incubation. However, for the  
 43 Omicron variant, viable virus could still be detected after a 30-minute incubation and the  
 44 reduction in titre was less than 3 log<sub>10</sub> units (99.34%). On printing paper, the virus titre of  
 45 ancestral SARS-CoV-2 reduced by 99.68% in 5 minutes and no infectious virus could be

46 detected after a 15-minute incubation. In contrast, the Omicron variant was more stable  
47 than the ancestral SARS-CoV-2, with viable Omicron variant virus still recovered from two  
48 out of three replicates after a 30-minute incubation.

49

50 Overall, the Omicron variant is more stable on different surfaces and materials than the  
51 ancestral strain. More evidence is needed to account for the increased transmissibility of  
52 Omicron variant observed in various community studies. The extra virus stability on  
53 surfaces may be one possible factor and should be taken into consideration when  
54 recommending control measures against the infection. A recent study revealed that an  
55 infectious dose as low as 10 TCID<sub>50</sub> units could infect more than 50% of human subjects  
56 (8). Our findings imply that Omicron variant has an increased likelihood to be transmitted  
57 by the fomite route. Hand hygiene and frequent disinfection of common touch surfaces in  
58 public areas are highly recommended. Guidelines for disinfecting a contaminated site  
59 might also need to be reviewed (<https://www.cdc.gov/coronavirus/2019-ncov/community/disinfecting-building-facility.html>). One may also speculate that the  
60 enhanced stability deduced from structural studies and now demonstrated on different  
61 surfaces may be relevant for droplet or aerosol transmission of SARS-CoV-2. Interestingly,  
62 stability of avian influenza A H5N1 viruses has been shown to have an association with  
63 transmissibility of avian influenza virus between mammals by the airborne route although  
64

65 the mechanisms underlying this association have not been fully understood (9). Further  
66 studies on the stability of Omicron variant in droplets and aerosols are warranted.

67

68 This study has some limitations. The experiments were carried out in a laboratory with  
69 well-controlled environment. Variation in the environmental conditions would affect the  
70 rate for viral inactivation. Therefore, the time required for virus inactivation demonstrated  
71 in this study may not completely reflect all scenarios in daily life. It should also be noted  
72 that the components of the medium of the viral droplets applied in this study were  
73 different from the respiratory droplets. This could also affect the stability of the virus.  
74 Irrespective of these effects, our findings demonstrate that the Omicron variant is more  
75 stable than the ancestral SARS-CoV-2 on different surfaces and we suggest that our  
76 findings may be relevant for public health.

77

## 78 **Acknowledgements:**

79 This work was supported by the Health and Medical Research Fund (COVID190116) and  
80 RGC theme-based research schemes (T11-705/21-N) and InnoHK grants for C2I.

81

## 82 **Biographical sketch of the first author:**

83 Dr. Alex W.H. Chin is currently a Research Assistant Professor of The University of Hong

84 Kong. His research interests include basic virology and pathogenesis of emerging  
85 respiratory viruses.

86

## 87 **References:**

- 88 1. World Health Organization. Coronavirus Update 74: Addressing the challenges of SARS-  
89 CoV-2 variants for public health. 25 Feb, 2022. Available from:  
90 [https://www.who.int/publications/m/item/update-74-addressing-the-challenges-of-sars-](https://www.who.int/publications/m/item/update-74-addressing-the-challenges-of-sars-cov-2-variants-for-public-health)  
91 [cov-2-variants-for-public-health](https://www.who.int/publications/m/item/update-74-addressing-the-challenges-of-sars-cov-2-variants-for-public-health)
- 92 2. Wang L, Cheng G. Sequence analysis of the emerging SARS-CoV-2 variant Omicron in  
93 South Africa. *J Med Virol*. 2022 Apr;94(4):1728-33.
- 94 3. Zeng C, Evans JP, Qu P, Faraone J, Zheng YM, Carlin C, et al. Neutralization and  
95 Stability of SARS-CoV-2 Omicron Variant. *bioRxiv*. [Preprint] 2021 Dec 20. Available  
96 from: <https://www.biorxiv.org/content/10.1101/2021.12.16.472934v1>
- 97 4. Chin AWH, Chu JTS, Perera MRA, Hui KPY, Yen HL, Chan MCW, et al. Stability of  
98 SARS-CoV-2 in different environmental conditions. *Lancet Microbe*. 2020 May;1(1):e10.
- 99 5. Sia SF, Yan LM, Chin AWH, Fung K, Choy KT, Wong AYL, et al. Pathogenesis and  
100 transmission of SARS-CoV-2 in golden hamsters. *Nature*. 2020 Jul;583(7818):834-8.
- 101 6. Cheng SMS, Mok CKP, Leung YWY, Ng SS, Chan KCK, Ko FW, et al. Neutralizing  
102 antibodies against the SARS-CoV-2 Omicron variant BA.1 following homologous and  
103 heterologous CoronaVac or BNT162b2 vaccination. *Nat Med*. 2022 Jan 20.
- 104 7. Behzadinasab S, Chin A, Hosseini M, Poon L, Ducker WA. A Surface Coating that  
105 Rapidly Inactivates SARS-CoV-2. *ACS Appl Mater Interfaces*. 2020 Aug  
106 5;12(31):34723-7.
- 107 8. Killingley B, Mann A, Kalinova M, Boyers A, Goonawardane N, Zhou J, et al. Safety,  
108 tolerability and viral kinetics during SARS-CoV-2 human challenge. *Research Square*  
109 [Preprint] 2022 Feb 1. Available from: [https://www.researchsquare.com/article/rs-](https://www.researchsquare.com/article/rs-1121993/v1)  
110 [1121993/v1](https://www.researchsquare.com/article/rs-1121993/v1).
- 111 9. Imai M, Herfst S, Sorrell EM, Schrauwen EJ, Linster M, De Graaf M, et al. Transmission  
112 of influenza A/H5N1 viruses in mammals. *Virus Res*. 2013 Dec 5;178(1):15-20.

113

**114 Table: Stability of the ancestral SARS-CoV-2 and Omicron variant on different surfaces**

| Materials       | Time of incubation | Ancestral SARS-CoV-2                                         |                                     | Omicron variant                                              |                                     |
|-----------------|--------------------|--------------------------------------------------------------|-------------------------------------|--------------------------------------------------------------|-------------------------------------|
|                 |                    | Mean<br>Log <sub>10</sub> (TCID <sub>50</sub> /ml)<br>± S.D. | %<br>Reduction<br>in viral<br>titre | Mean<br>Log <sub>10</sub> (TCID <sub>50</sub> /ml)<br>± S.D. | %<br>Reduction<br>in viral<br>titre |
| Stainless steel | 0                  | 5.02 ± 0.39                                                  | NA                                  | 5.35 ± 0.18                                                  | NA                                  |
|                 | 3 h                | 4.21 ± 0.36                                                  | 85.15%                              | 4.82 ± 0.23                                                  | 69.78%                              |
|                 | 6 h                | 3.73 ± 0.10                                                  | 95.80%                              | 4.62 ± 0.31                                                  | 79.86%                              |
|                 | 1 day              | 2.99 ± 0.17                                                  | 99.21%                              | 4.65 ± 0.17                                                  | 80.28%                              |
|                 | 2 days             | 2.08 ± 0.11                                                  | 99.91%                              | 4.51 ± 0.15                                                  | 85.82%                              |
|                 | 4 days             | <                                                            | >99.93%                             | 3.72 ± 0.12                                                  | 97.72%                              |
|                 | 7 days             | <                                                            | >99.93%                             | 3.58 ± 0.30                                                  | 98.19%                              |
| Poly-propylene  | 0                  | 4.85 ± 0.23                                                  | NA                                  | 5.43 ± 0.16                                                  | NA                                  |
|                 | 3 h                | 4.12 ± 0.19                                                  | 81.72%                              | 4.65 ± 0.34                                                  | 81.27%                              |
|                 | 6 h                | 3.53 ± 0.15                                                  | 95.43%                              | 4.33 ± 0.14                                                  | 92.34%                              |
|                 | 1 day              | 3.13 ± 0.34                                                  | 97.86%                              | 4.45 ± 0.23                                                  | 89.25%                              |
|                 | 2 days             | *2.01 ± 0.10                                                 | >99.86%                             | 4.34 ± 0.25                                                  | 91.53%                              |
|                 | 4 days             | <                                                            | >99.88%                             | 3.97 ± 0.19                                                  | 96.48%                              |
|                 | 7 days             | <                                                            | >99.88%                             | 2.95 ± 0.27                                                  | 99.65%                              |
| Glass           | 0                  | 5.10 ± 0.24                                                  | NA                                  | 5.65 ± 0.28                                                  | NA                                  |
|                 | 3 h                | 4.26 ± 0.05                                                  | 86.79%                              | 4.90 ± 0.15                                                  | 83.62%                              |
|                 | 6 h                | 3.69 ± 0.11                                                  | 96.42%                              | 4.52 ± 0.13                                                  | 93.20%                              |
|                 | 1 day              | 2.83 ± 0.13                                                  | 99.49%                              | 4.20 ± 0.01                                                  | 96.84%                              |
|                 | 2 days             | 2.14 ± 0.13                                                  | 99.90%                              | 4.43 ± 0.29                                                  | 93.87%                              |
|                 | 4 days             | *1.96 ± 0.00                                                 | >99.93%                             | 4.06 ± 0.16                                                  | 97.64%                              |
|                 | 7 days             | <                                                            | >99.93%                             | 3.76 ± 0.10                                                  | 98.83%                              |
| Tissue paper    | 0                  | 4.70 ± 0.22                                                  | NA                                  | 5.21 ± 0.14                                                  | NA                                  |
|                 | 5 min              | 3.85 ± 0.28                                                  | 84.98%                              | 4.64 ± 0.70                                                  | 53.94%                              |
|                 | 15 min             | 2.12 ± 0.14                                                  | 99.75%                              | 3.72 ± 1.22                                                  | 72.99%                              |
|                 | 30 min             | <                                                            | >99.84%                             | 2.92 ± 0.40                                                  | 99.34%                              |
|                 | 60 min             | <                                                            | >99.84%                             | <                                                            | >99.95%                             |
| Printing paper  | 0                  | 5.21 ± 0.00                                                  | NA                                  | 5.34 ± 0.13                                                  | NA                                  |
|                 | 5 min              | 2.69 ± 0.16                                                  | 99.68%                              | 3.26 ± 0.42                                                  | 98.91%                              |
|                 | 15 min             | <                                                            | >99.94%                             | *2.20 ± 0.33                                                 | >99.91%                             |
|                 | 30 min             | <                                                            | >99.94%                             | *2.16 ± 0.36                                                 | >99.92%                             |
|                 | 60 min             | <                                                            | >99.94%                             | <                                                            | >99.96%                             |

115 < All the triplicates were below detection limit of the TCID<sub>50</sub> assay.

116 \*One or two out of three replicates were below detection limit of the TCID<sub>50</sub> assay.
